# Supplementary material for: Early Cardiometabolic Dysregulation in Semi-Urban Nigerian Communities: A Focus on Prehypertension and Prediabetes
Source: Research Square preprint supplement (doi:10.21203/rs.3.rs-7443355/v1), 2025-10-28
Supplement: Supplementary file 1 [file aa30013d857134404e0a4a50.docx]

# Supplementary File 1. Diabetes and Hypertension Screening Questionnaire

(Mark Anumah Medical Missions Outreach)

This structured interviewer-administered questionnaire was developed specifically for this study on diabetes and hypertension to collect demographic, anthropometric, and clinical data during community medical outreach.

## Section A: Identification and Demographics

Unique ID number: _____________ Name (Optional): __________________________

Sex: ☐ Male ☐ Female Age (in completed years): ___________

Address / Community: _____________________________________________________

## Section B: Anthropometric Measurements

Height (cm) [without shoes, nearest 0.1 cm]: _________

Weight (kg) [light clothing, nearest 0.1 kg]: _________

Waist circumference (cm) [midpoint between lowest rib and iliac crest]: _________

## Section C: Blood Pressure (Measured on right arm, seated, after 5 minutes rest. Two readings at least 5 minutes apart; average recorded).

Systolic Blood Pressure (mmHg): Reading 1: _____________ Reading 2: ___________

Diastolic Blood Pressure (mmHg) - Reading 1: ____________ Reading 2: ___________

## Section D: Biochemical Measurement (Capillary finger-prick, Accu-Chek® device)

Random Blood Glucose (mmol/L) _______________
